# Supplementary material for: The Breast Cancer Single-Cell Atlas: Defining cellular heterogeneity within model cell lines and primary tumors to inform disease subtype, stemness, and treatment options
Source: PubMed Central journal article supplement (PMC10205851; doi:10.1007/s13402-022-00765-7), 2023-01-04
Supplement: 13402_2022_765_MOESM4_ESM.pdf [file 13402_2022_765_MOESM4_ESM.pdf]

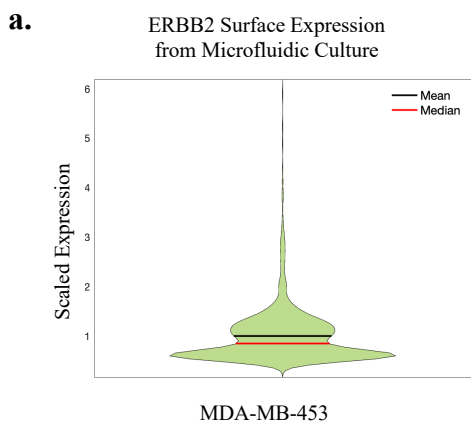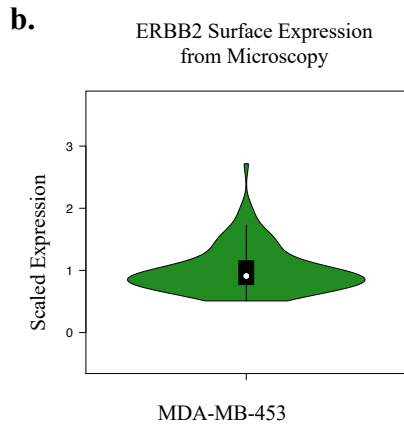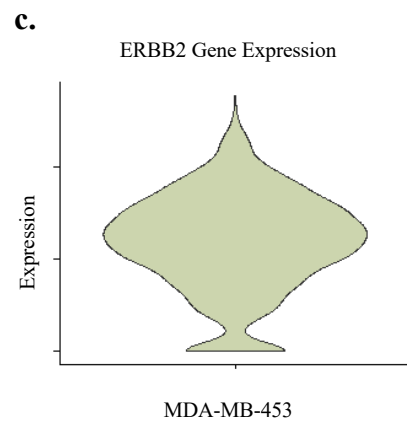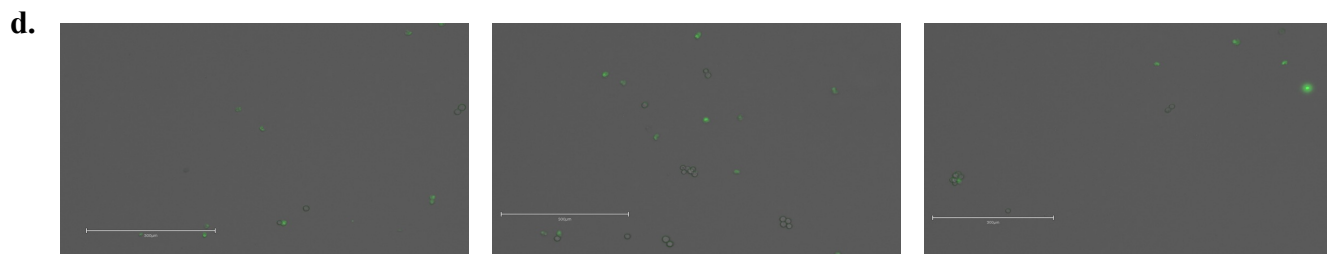

**e.**

|                |                             |      |      |      |      |      |      |      |      |      |      |      |      |      |      |      |      |      |      |      |      |
|----------------|-----------------------------|------|------|------|------|------|------|------|------|------|------|------|------|------|------|------|------|------|------|------|------|
| ERBB2 Negative | Brightfield                 |      |      |      |      |      |      |      |      |      |      |      |      |      |      |      |      |      |      |      |      |
|                | ERBB2                       |      |      |      |      |      |      |      |      |      |      |      |      |      |      |      |      |      |      |      |      |
|                | Normalized Expression Value | 0.60 | 0.60 | 0.59 | 0.59 | 0.59 | 0.59 | 0.59 | 0.59 | 0.59 | 0.59 | 0.59 | 0.59 | 0.59 | 0.59 | 0.59 | 0.59 | 0.59 | 0.59 | 0.59 | 0.59 |
| ERBB2 Positive | Brightfield                 |      |      |      |      |      |      |      |      |      |      |      |      |      |      |      |      |      |      |      |      |
|                | ERBB2                       |      |      |      |      |      |      |      |      |      |      |      |      |      |      |      |      |      |      |      |      |
|                | Normalized Expression Value | 5.89 | 5.24 | 4.89 | 4.36 | 4.19 | 4.07 | 3.83 | 3.83 | 3.82 | 3.55 | 3.38 | 3.24 | 3.21 | 3.14 | 3.09 | 3.06 | 3.03 | 2.98 | 2.93 | 2.91 |
