# Supplementary material for: The Breast Cancer Single-Cell Atlas: Defining cellular heterogeneity within model cell lines and primary tumors to inform disease subtype, stemness, and treatment options
Source: PubMed Central journal article supplement (PMC10205851; doi:10.1007/s13402-022-00765-7), 2023-01-04

## MDA-MB-436

### a. MDAMB436 Cluster UMAP

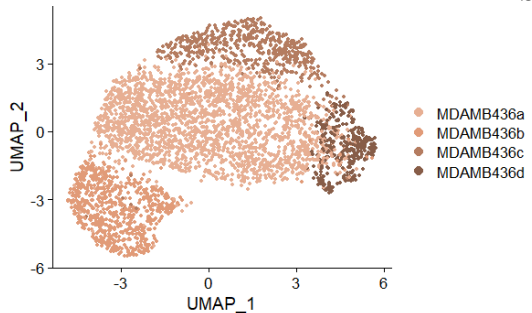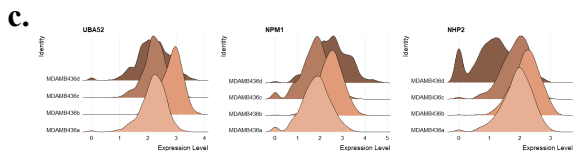

### b.

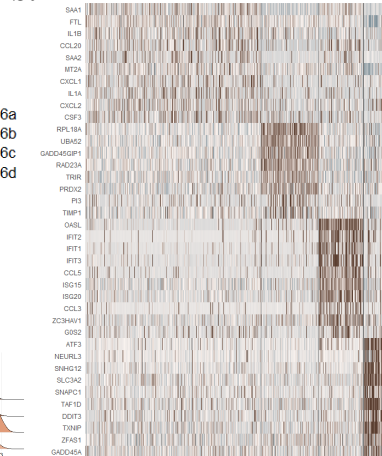

### d.

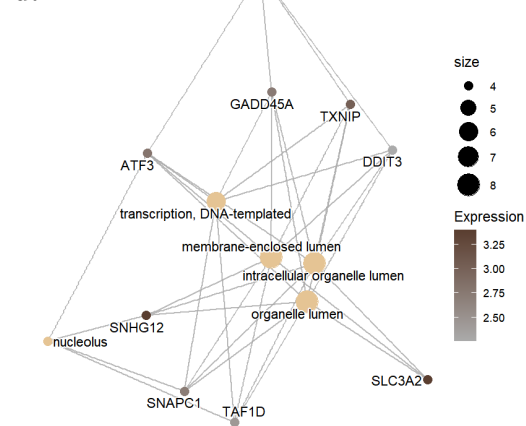

### e. BT549 Cluster UMAP

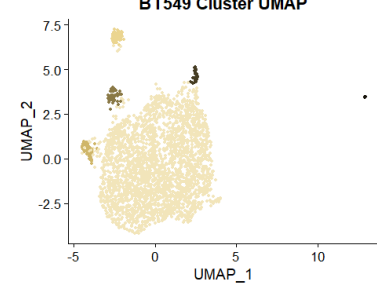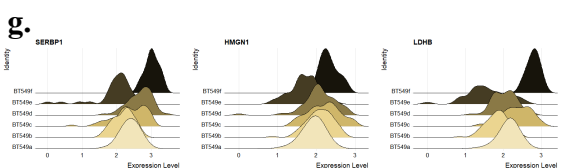

## BT-549

### f.

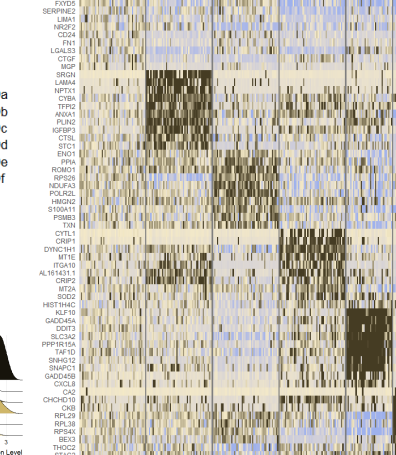

### h.

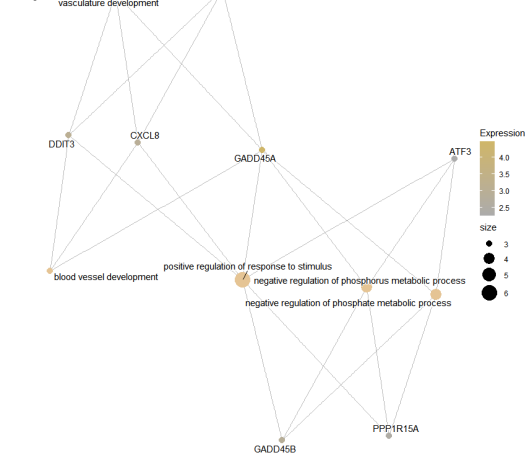

## MCF-7 INTER SAMPLE ANALYSIS

### i. MCF7 Lines UMAP

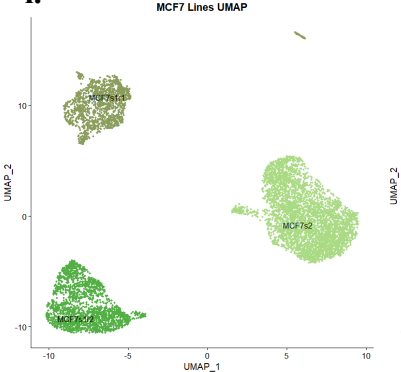

### j. MCF7 Clustered UMAP

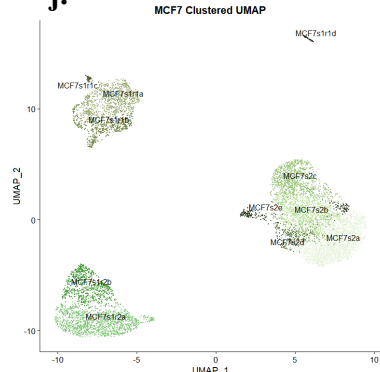

### k.

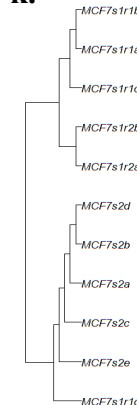

### l.

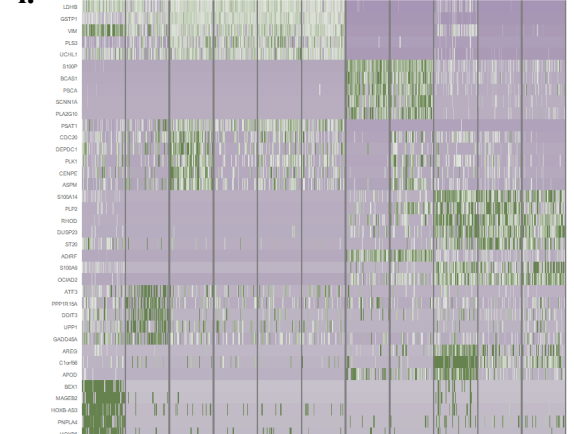

Supplement: 13402_2022_765_MOESM6_ESM.pdf [file 13402_2022_765_MOESM6_ESM.pdf]
