# Supplementary material for: The Breast Cancer Single-Cell Atlas: Defining cellular heterogeneity within model cell lines and primary tumors to inform disease subtype, stemness, and treatment options
Source: PubMed Central journal article supplement (PMC10205851; doi:10.1007/s13402-022-00765-7), 2023-01-04

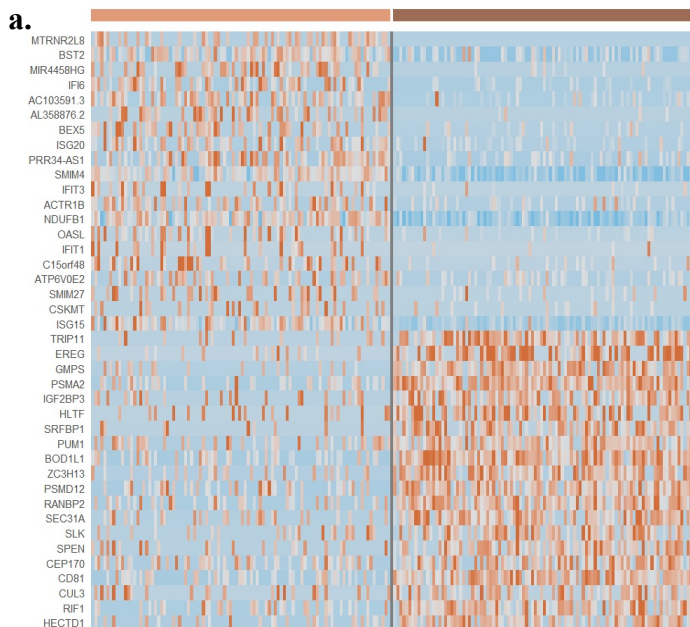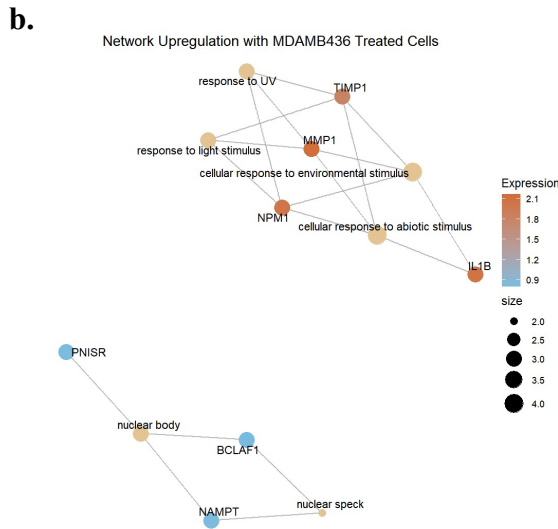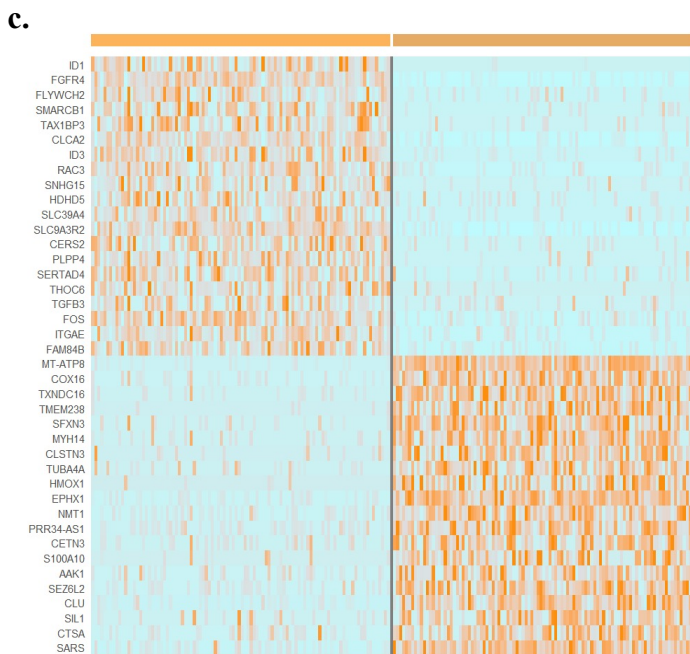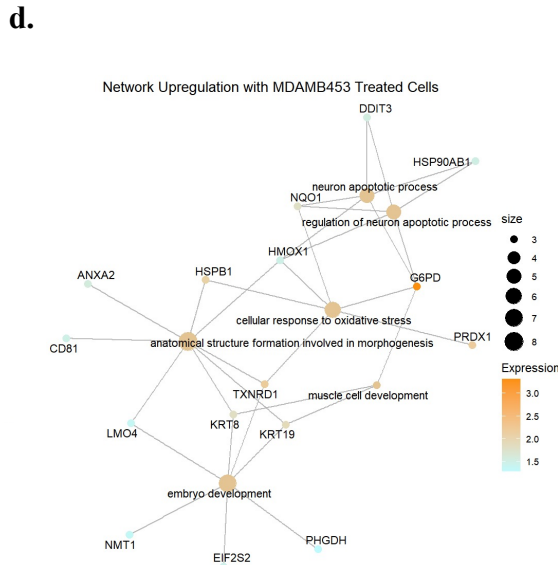

Supplement: 13402_2022_765_MOESM7_ESM.pdf [file 13402_2022_765_MOESM7_ESM.pdf]
